# Supplementary material for: Angiopoietin-1 Mimetic Nanoparticles for Restoring the Function of Endothelial Cells as Potential Therapeutic for Glaucoma
Source: MDPI journal article supplement (doi:10.3390/ph15010018), 2021-12-24
Supplement: s1 [file s1]

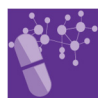

# Supplementary Materials: Angiopoietin-1 Mimetic Nanoparticles for Restoring the Function of Endothelial Cells as Potential Therapeutic for Glaucoma

Raphael Mietzner, Ramona Pawlak, Ernst R. Tamm, Achim Goepferich, Rudolf Fuchshofer and Miriam Breunig\*

MTT (3-(4,5-dimethylthiazol-2-yl)-2,5-diphenyltetrazolium bromide)-assay was used to determine the viability of HUVECs, EA.hy926 cells and fibroblasts treated with NPs containing a ligand density of 100% at indicated concentrations. The assay was performed according to previous publication with slight modifications [1]. Cells were seeded in a 96-well plate at a density of 12,000 cells/well for EA.hy926 cells, 10,000 cells/well for HUVECs and 7,500 cells/well for fibroblasts. Cells were cultivated for 24 hours at 37 °C and 5% CO<sub>2</sub>. Subsequently, cells were washed with DPBS and the culture medium was replaced by 100 µL NP dilutions ranging from 0.01 to 0.4 mg/mL in appropriate culture medium supplemented with 0.35% FBS. After 4 hours of incubation with NPs, NP containing supernatant was replaced by fresh culture medium containing 10% FBS and cells were incubated for additional 19 hours at 37 °C and 5% CO<sub>2</sub>. Thereafter, culture medium was replaced by 200 µL of MTT (625 µg/mL in serum-free culture medium) and further incubated for 5 hours at 37 °C. Then, the supernatant was replaced by 60 µL DPBS containing 10% (w/v) sodium dodecyl sulfate (SDS). The cells were incubated overnight in the dark and room temperature. The absorbance of formazan was measured at 570–690 nm using a microplate reader (Fluostar Omega; BMG Labtech GmbH, Ortenberg, Germany). As positive and negative control served cells treated with DPBS and 0.1% (w/v) SDS, respectively. The results were calculated as the mean percentage of viability in relation to the positive control. Viabilities below 70% were considered as cytotoxic. (n=6).

Figure S1 shows the cell viability data of NP-treated HUVECs, EA.hy926 and fibroblasts. Data indicate that all analyzed cell types tolerated well all used NP concentrations.

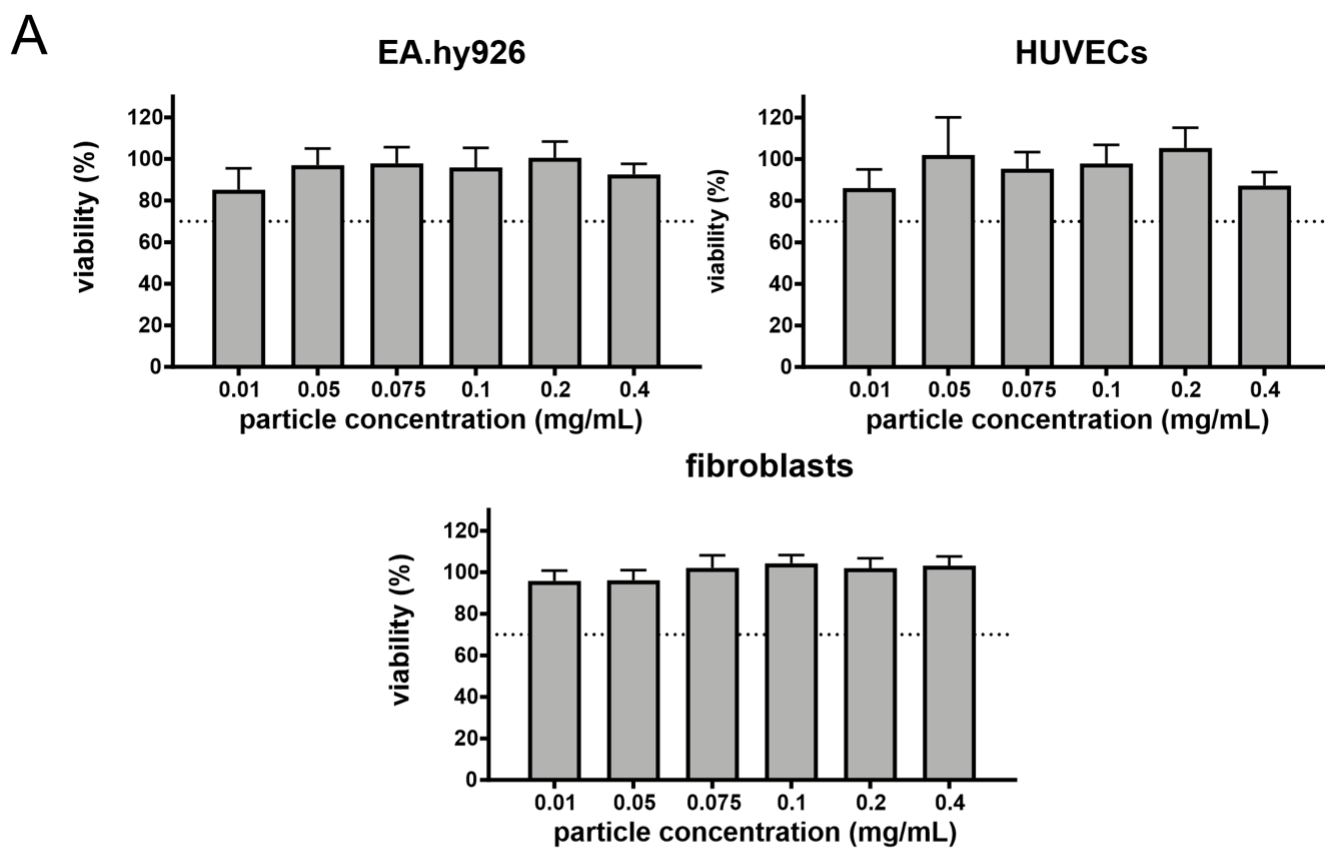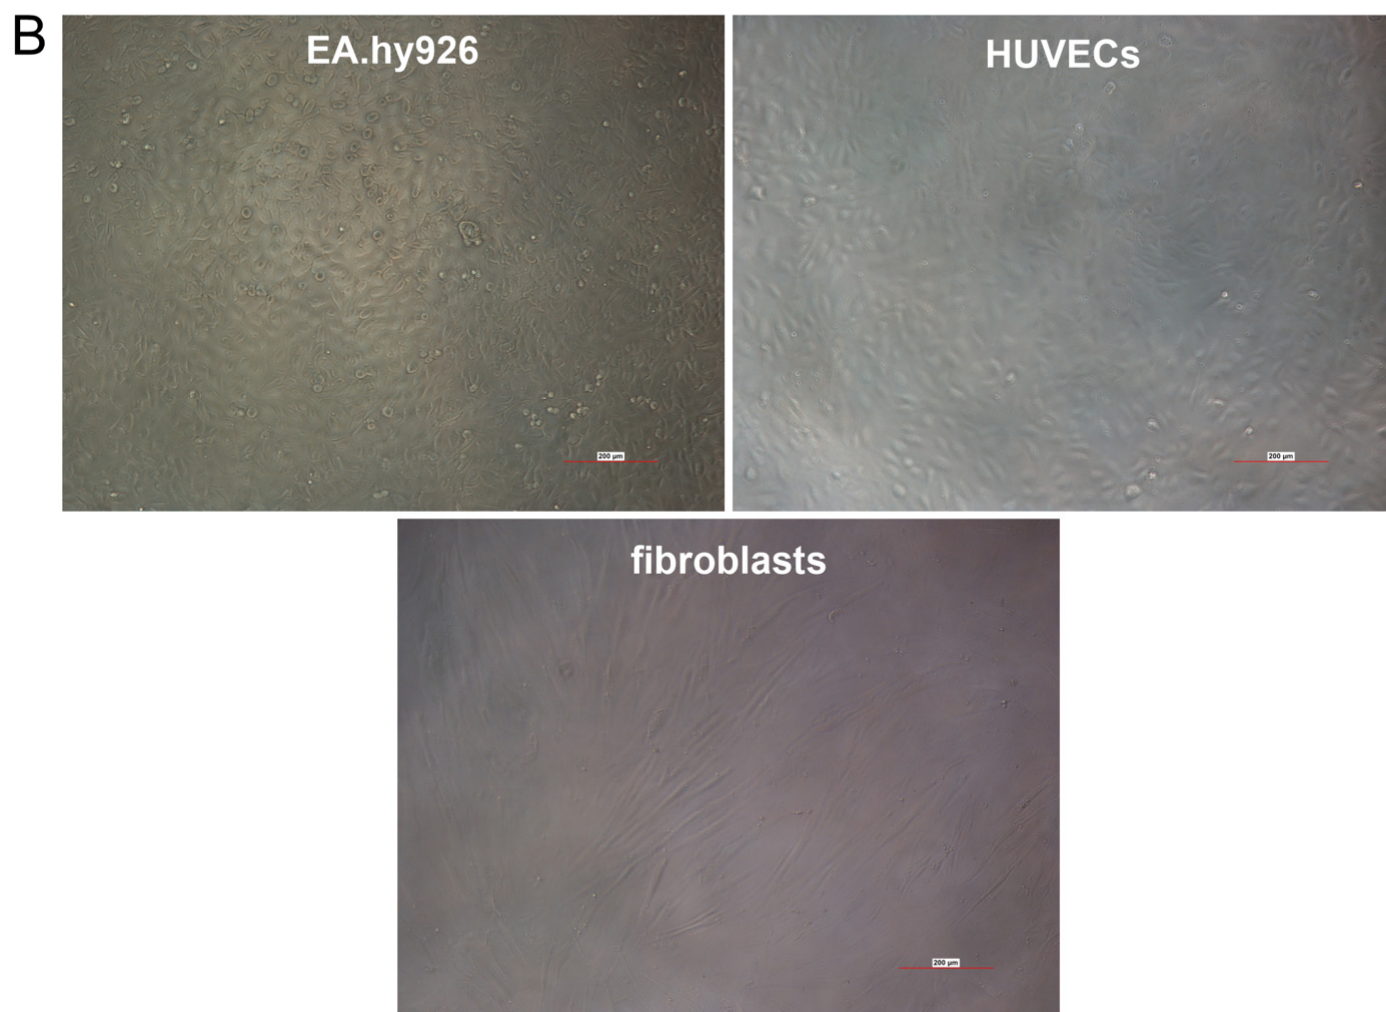

**Figure S1.** NPs are well tolerated by HUVECs, EA.hy926 and fibroblasts. (A) Cells were incubated for 4 hours with different NP concentrations ranging from 0.01 to 0.4 mg/mL in appropriate culture medium containing 0.35% FBS. Data are presented as mean percentage of viability  $\pm$  SD of the mean ( $n=6$ ). (B) Representative brightfield images of cells treated with NPs (0.4 mg/mL) before MTT reagent was added. Bars indicate 200  $\mu$ m.

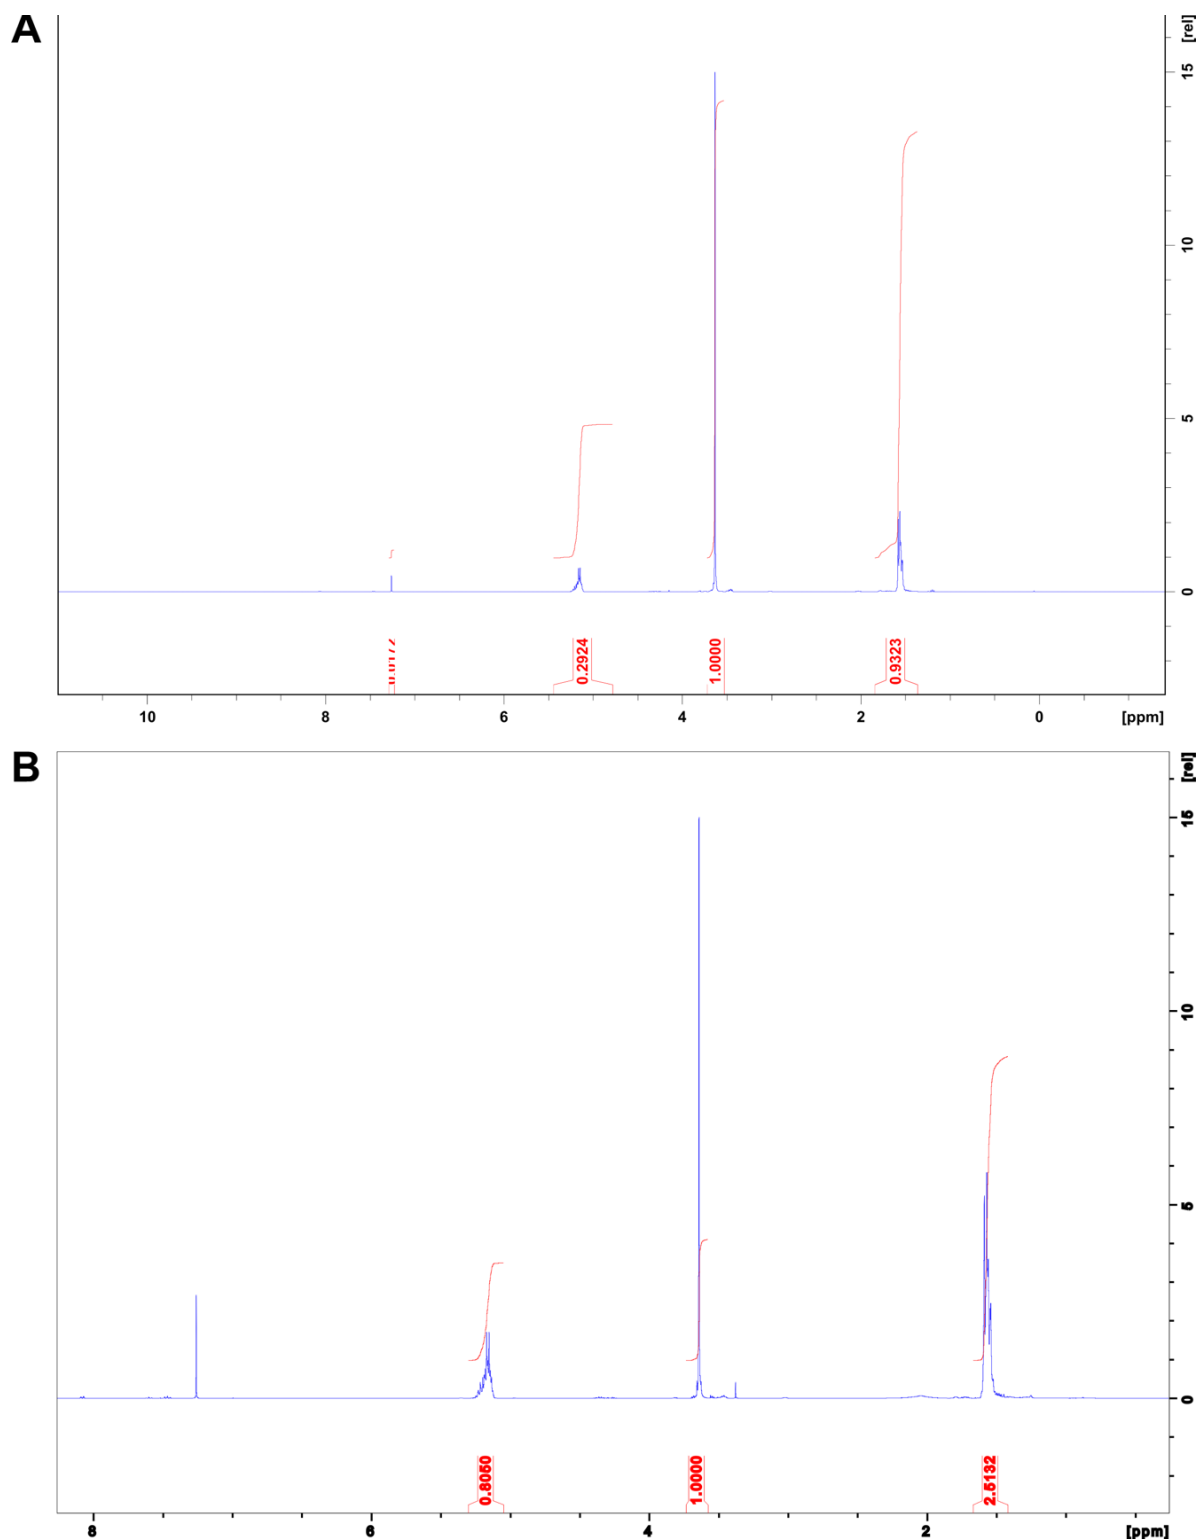

**Figure S2.** <sup>1</sup>H-NMR (CDCl<sub>3</sub>, 400 MHz) spectra of MeO-PEG<sub>2k</sub>-PLA<sub>10k</sub> (A) and COOH-PEG<sub>5k</sub>-PLA<sub>10k</sub> (B): 1.55 ppm ( $-C(CH_3)H-$ ), 3.43 ppm ( $H_3COCH_2CH_2-$ ), 3.64 ppm ( $-OCH_2CH_2-$ ), 5.17 ppm ( $-C(CH_3)H-$ ), 7.26 ppm (solvent peak).

## References

---

1. Mietzner, R.; Kade, C.; Froemel, F.; Pauly, D.; Stamer, W.D.; Ohlmann, A.; Wegener, J.; Fuchshofer, R.; Breunig, M. Fasudil Loaded PLGA Microspheres as Potential Intravitreal Depot Formulation for Glaucoma Therapy. *Pharmaceutics* 2020, 12, doi:10.3390/pharmaceutics12080706.
